# Supplementary material for: Fabrication of core–shell Ag@pDA@HAp nanoparticles with the ability for controlled release of Ag+and superior hemocompatibility
Source: Royal Society of Chemistry journal article supplement (doi:10.1039/c7ra03494f), 2017-01-01
Supplement: c7ra03494f1.pdf [file c7ra03494f1.pdf]

## **Fabrication of Core-Shell Ag@pDA@HAp Nanoparticles with Controlled Release Ability of Ag<sup>+</sup> and Superior Hemocompatibility**

Keling Chen,<sup>a</sup> Kenan Xie,<sup>a</sup> Qin Long,<sup>a</sup> Lijun Deng,<sup>a</sup> Zhiqiang Fu,<sup>a</sup> Huanhuan Xiao<sup>a</sup> and Lu Xie<sup>b\*</sup>

<sup>a</sup> School of Chemical and Engineering, Sichuan University, Chengdu 610065, China

<sup>b</sup> West China School of Stomatology, Sichuan University, Chengdu 610041, China

\*Email: [Xielu2017@163.com](mailto:Xielu2017@163.com) Tel.: 0086-15198002007

### **Supporting information**

**Fig. S.1.** Particle size distribution graphs of Ag-NPs, Ag@pDA-NPs and Ag@pDA@HAp-NPs of Ag-NPs, Ag@pDA-NPs and Ag@pDA@HAp-NPs.

**Fig. S.2.** Typical XRD patterns of Ag-NPs, Ag@pDA-NPs and Ag@pDA@HAp-NPs

**Fig. S.3.** N1s XPS spectra of Ag@pDA-NPs (a) and Ag@pDA@HAp-NPs (b), Ag3d XPS spectra of Ag@pDA-NPs and Ag@pDA@HAp-NPs (c), Ca2p XPS spectra of Ag@pDA@HAp-NPs (d), and P2p XPS spectra of Ag@pDA@HAp-NPs (e).

**Table S.1:** The sizes of bacterial growth inhibition zones against *S. aureus* and *E. coli*

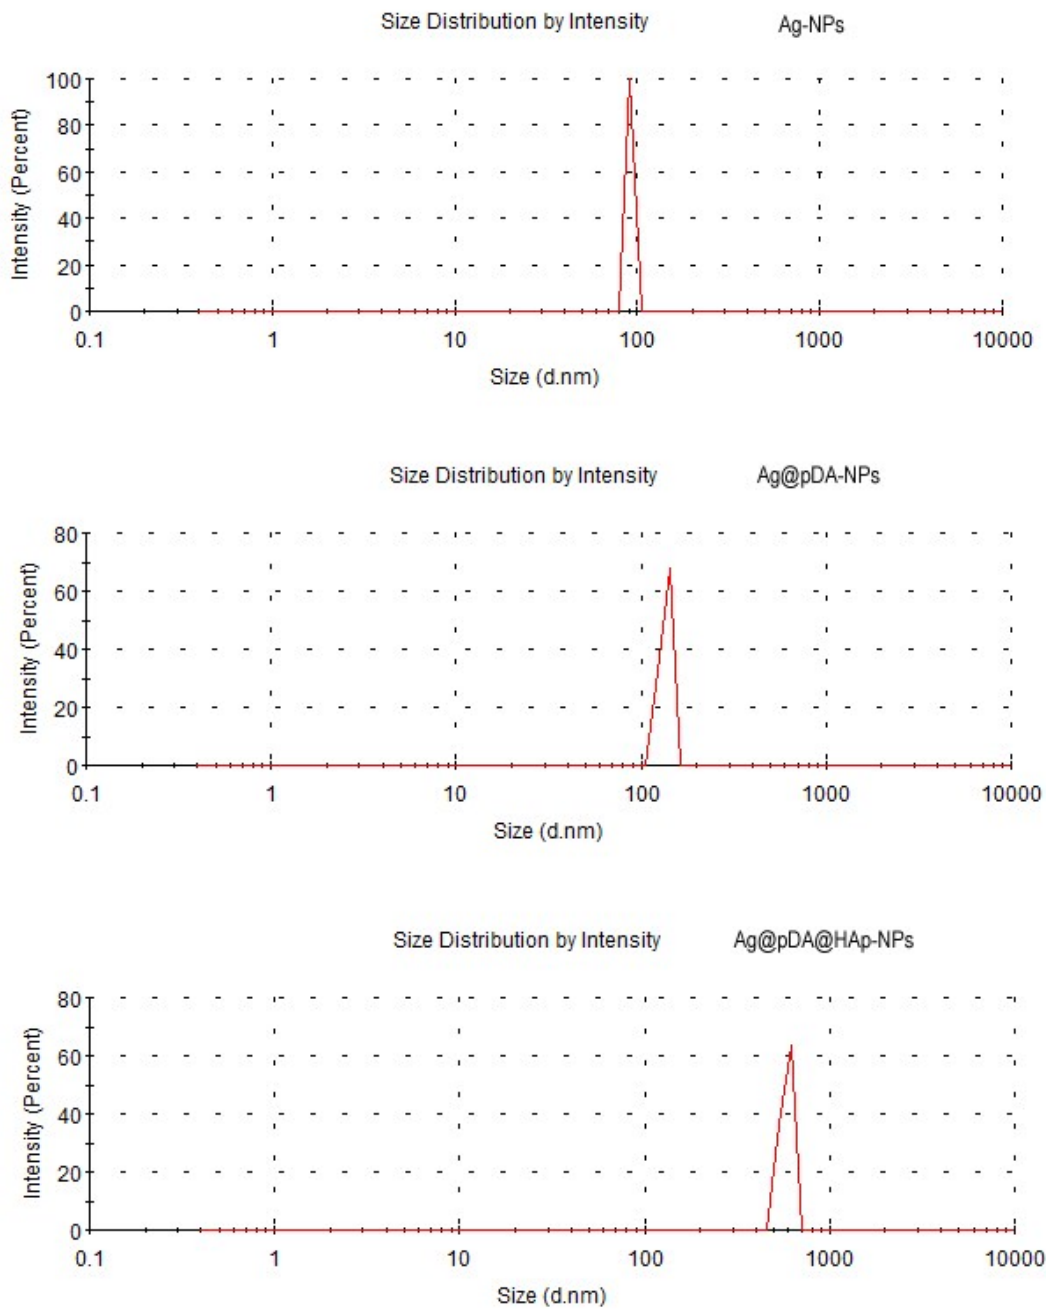

Fig. S.1. Particle size distribution graphs of Ag-NPs, Ag@pDA-NPs and Ag@pDA@HAp-NPs.

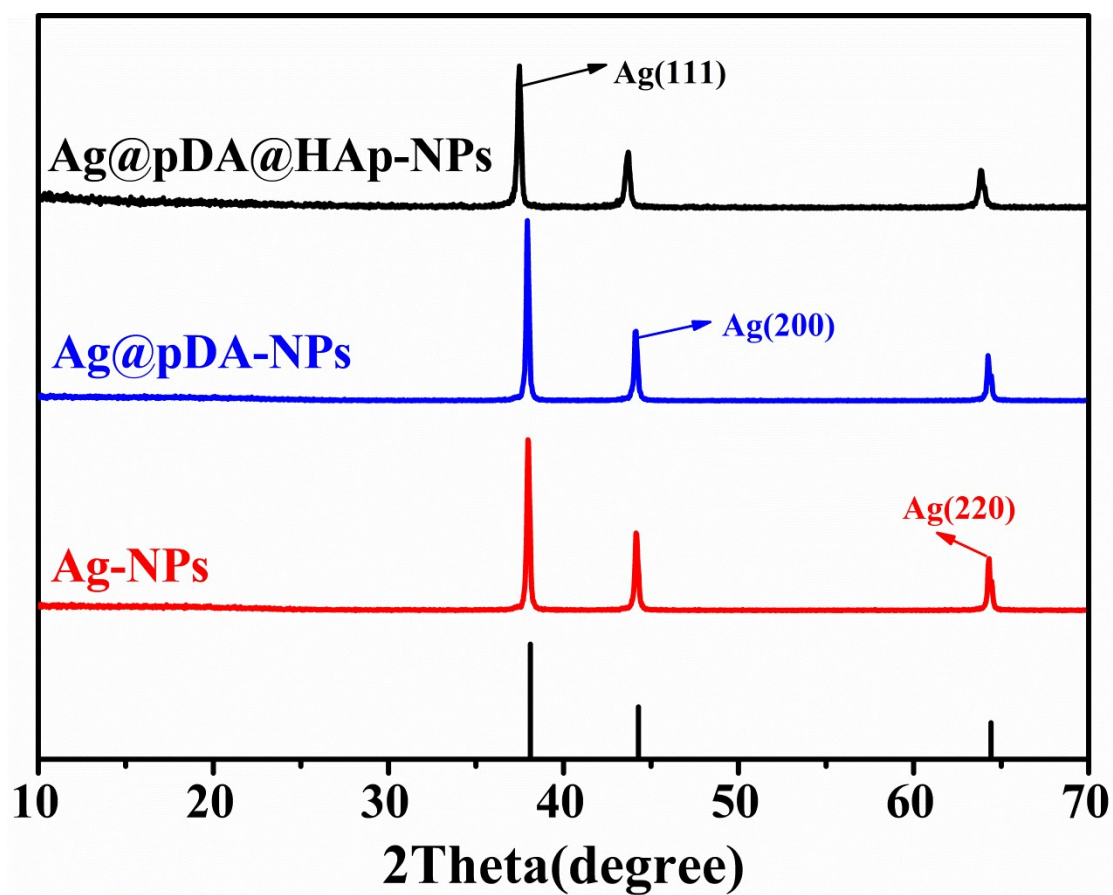

Fig. S.2. Typical XRD patterns of Ag-NPs, Ag@pDA-NPs and Ag@pDA@HAp-NPs

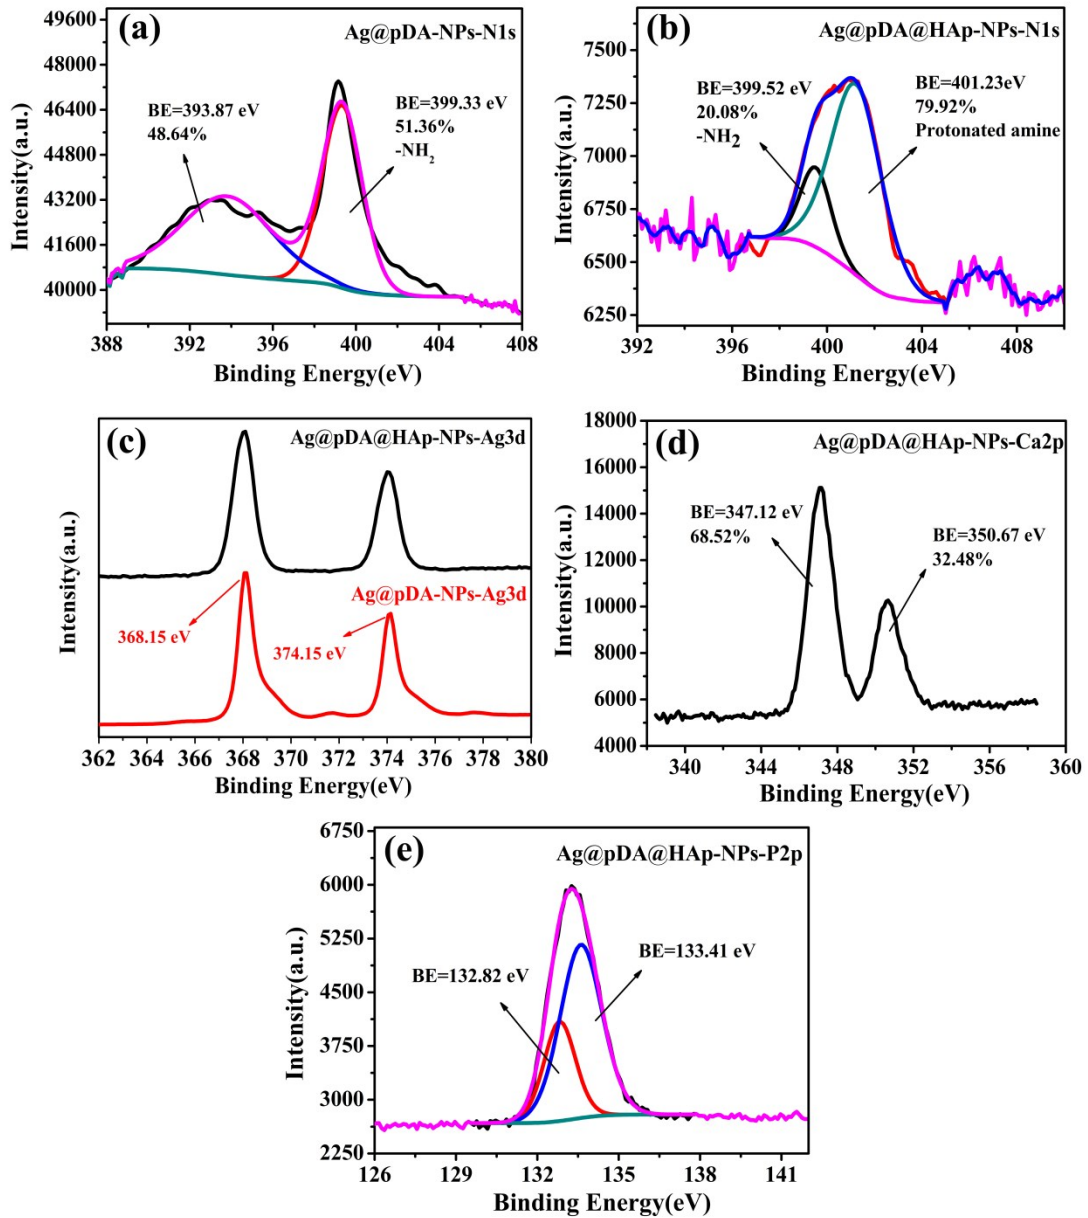

**Fig. S.3.** N1s XPS spectra of Ag@pDA-NPs (a) and Ag@pDA@HAp-NPs (b), Ag3d XPS spectra of Ag@pDA-NPs and Ag@pDA@HAp-NPs (c), Ca2p XPS spectra of Ag@pDA@HAp-NPs (d), and P2p XPS spectra of Ag@pDA@HAp-NPs (e).

**Table S.1:** The sizes of bacterial growth inhibition zones against *S. aureus* and *E. coli*

| Samples        | Size against <i>S. aureus</i> | Size against <i>E. coli</i> |
|----------------|-------------------------------|-----------------------------|
| name           | (mean $\pm$ SD) (mm)          | (mean $\pm$ SD) (mm)        |
| HAp-NPs        | 0                             | 0                           |
| Ag-NPs         | 3.14 $\pm$ 0.04               | 3.22 $\pm$ 0.09             |
| Ag@pDA@HAp-NPs | 1.42 $\pm$ 0.03               | 1.05 $\pm$ 0.09             |
